# Supplementary material for: A topological path to the formation of a quasi-planar B70 boron cluster and its dianion
Source: Royal Society of Chemistry journal article supplement (doi:10.1039/d2cp05452c), 2023-04-10
Supplement: d2cp05452c1.pdf [file d2cp05452c1.pdf]

## Supplementary Information (ESI)

# A topological path to the formation of the quasi-planar **B<sub>70</sub>** boron cluster and its dianion

**Pinaki Saha,<sup>1</sup> Fernando Buendía,<sup>2</sup> Long Van Duong<sup>3</sup> and Minh Tho Nguyen<sup>4,5\*</sup>**

1. Department of Chemistry, KU Leuven, Celestijnenlaan 200F, B-3001 Leuven, Belgium
2. Instituto de Física, Universidad Nacional Autónoma de México, C.P. 04510 Cd. de México.
3. Department of Chemistry, Quy Nhon University, Quy Nhon, Vietnam
4. Laboratory for Chemical Computation and Modeling, Institute for Computational Science and Artificial Intelligence, Van Lang University, Ho Chi Minh City, Vietnam.
5. Faculty of Applied Technology, School of Technology, Van Lang University, Ho Chi Minh City, Vietnam

\* Corresponding author. Email: [minhtho.nguyen@vlu.edu.vn](mailto:minhtho.nguyen@vlu.edu.vn)

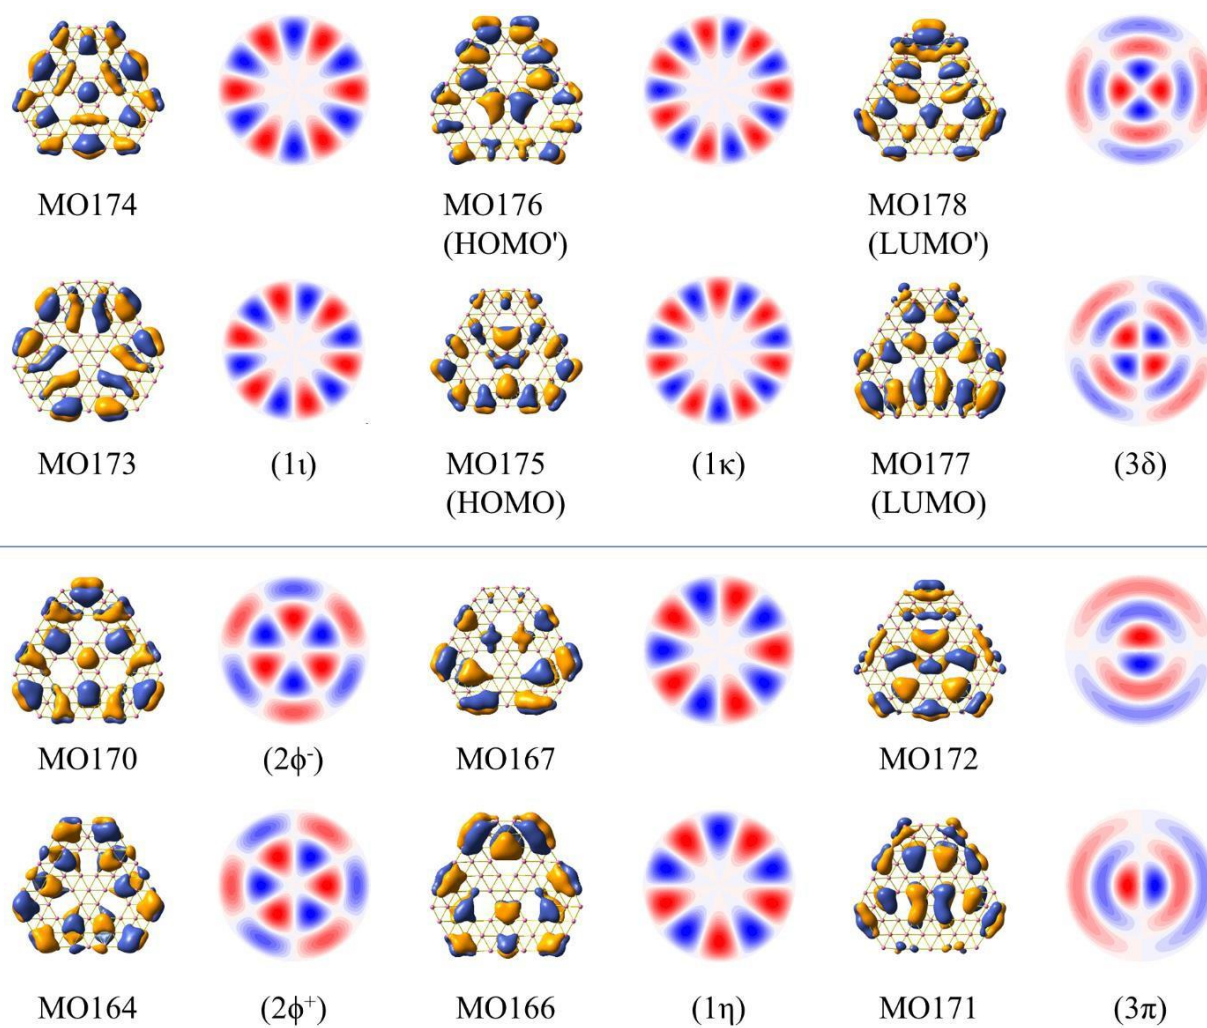

**Figure S1b.** Correspondence between the  $\pi$ -MO of the  $B_{70}^{2-}$  dianion with the energy levels of the Disk Aromaticity Model (DM; continued).

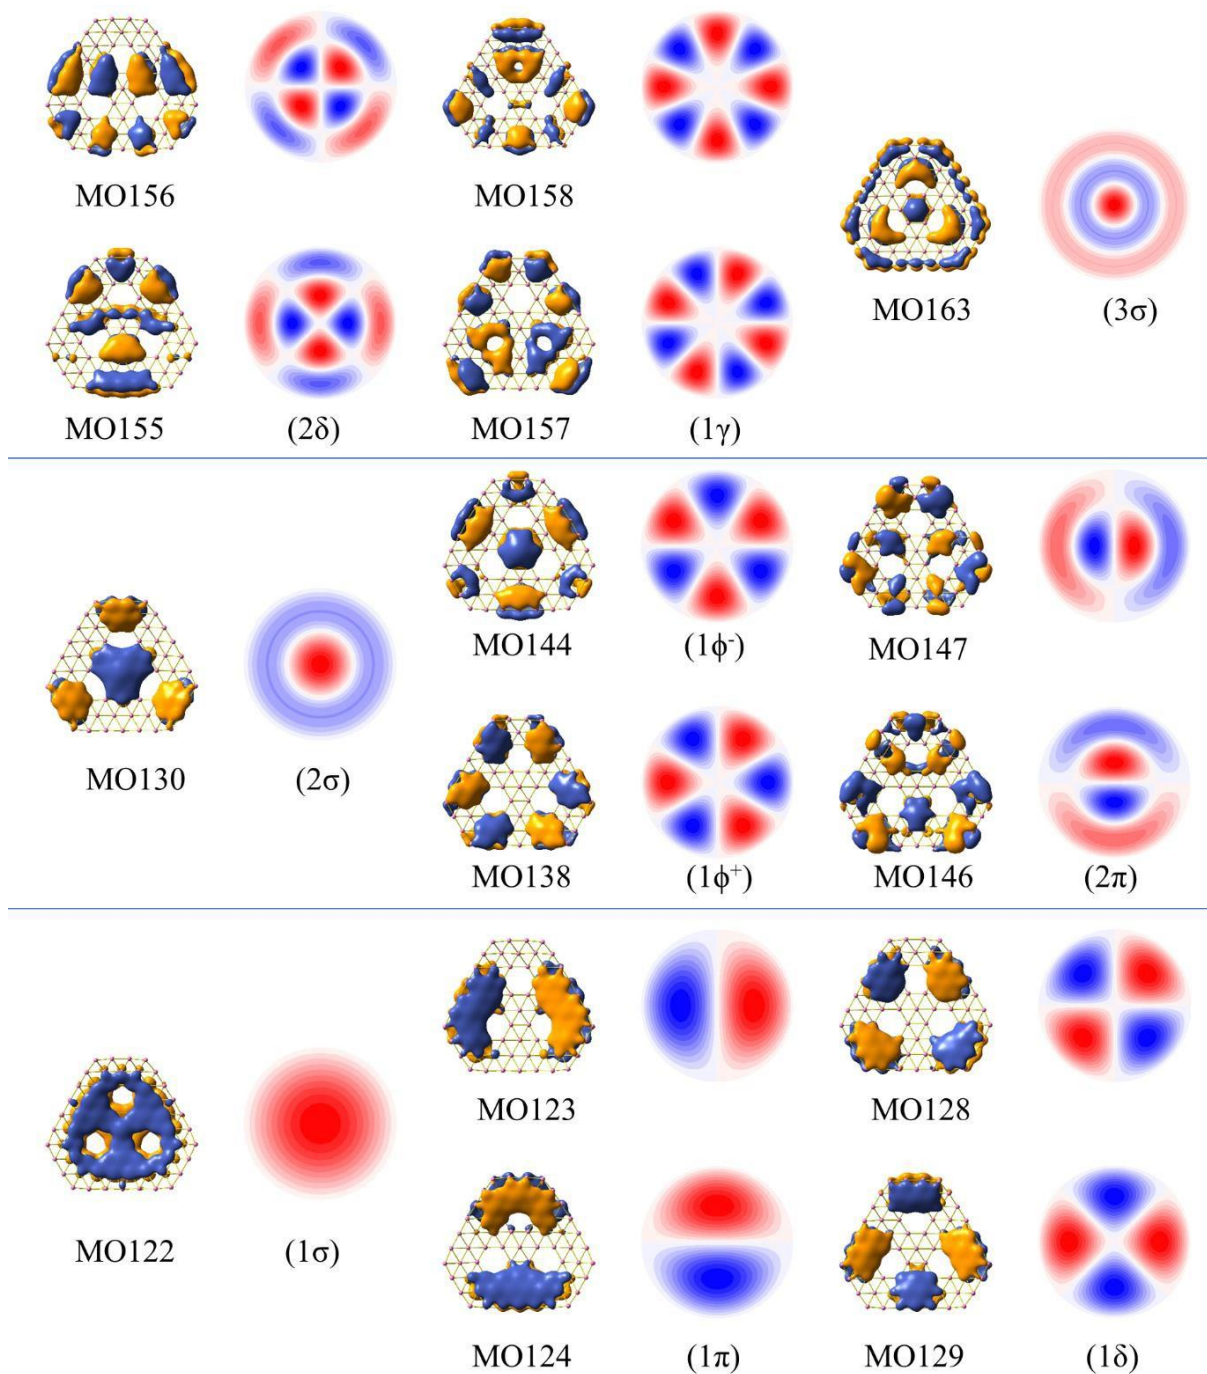

**Figure S1a:** Correspondence between the  $\pi$ -MO of the  $B_{70}^{2-}$  dianion with the energy levels of the Disk Aromaticity Model (DM).

Cartesian coordinates of the main neutral ( $B_{70}$ ) and dianionic ( $B_{70}^{2-}$ ) structures of the  $B_{70}$  boron cluster (B3PW91/6-311G optimizations).

$B_{70}$  Quasiplanar Structure neutral (III)

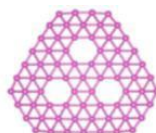

|   |              |              |              |
|---|--------------|--------------|--------------|
| B | -0.565772000 | -4.942010000 | -0.156266000 |
| B | -4.594182000 | -1.936701000 | -0.189295000 |
| B | -0.411915000 | -3.312812000 | -0.731780000 |
| B | 3.075443000  | 1.299352000  | -0.732884000 |
| B | -3.060384000 | -1.326775000 | -0.724797000 |
| B | -4.238038000 | 1.339317000  | -0.390835000 |
| B | 1.155382000  | -2.698220000 | -0.837923000 |
| B | 4.385183000  | 0.326168000  | -0.484979000 |
| B | -2.909720000 | 0.348188000  | -0.828802000 |
| B | 4.186624000  | -1.353328000 | -0.491974000 |
| B | 0.001522000  | -0.000582000 | -1.067556000 |
| B | -4.434647000 | -0.301363000 | -0.391652000 |
| B | -1.910610000 | -3.963449000 | -0.491264000 |
| B | 2.478566000  | -3.689267000 | -0.385201000 |
| B | 0.959159000  | -4.339004000 | -0.382449000 |
| B | 2.682528000  | -1.989119000 | -0.735688000 |
| B | 4.570173000  | 1.984334000  | -0.178413000 |
| B | -0.920806000 | 4.301684000  | -0.489149000 |
| B | -3.260344000 | -2.945272000 | -0.476015000 |
| B | 0.381541000  | 3.315352000  | -0.728846000 |
| B | -2.660463000 | 2.011301000  | -0.723307000 |
| B | 1.758990000  | 2.348167000  | -0.835190000 |
| B | 3.969197000  | -3.003836000 | -0.165687000 |
| B | 3.279753000  | 3.000014000  | -0.387417000 |
| B | -2.472803000 | 3.631379000  | -0.474823000 |
| B | 0.617408000  | 4.936267000  | -0.157627000 |
| B | -4.006399000 | 2.965703000  | -0.186210000 |
| B | 1.956447000  | 3.989582000  | -0.383010000 |
| B | -0.241333000 | -1.684582000 | -0.968037000 |
| B | 1.387219000  | -0.987693000 | -0.969879000 |
| B | 0.163033000  | 1.693008000  | -0.966331000 |
| B | -1.545931000 | -0.707464000 | -0.963438000 |
| B | -1.335229000 | 1.051773000  | -0.962665000 |
| B | 1.581164000  | 0.631372000  | -0.968263000 |
| B | 0.842322000  | 6.485442000  | 0.682433000  |
| B | -0.728678000 | 5.881325000  | 0.163209000  |
| B | -2.232284000 | 5.213322000  | 0.063212000  |
| B | -5.282955000 | 3.871735000  | 0.656871000  |
| B | -5.729515000 | 0.685644000  | 0.267752000  |

|   |              |              |             |
|---|--------------|--------------|-------------|
| B | -5.861101000 | -0.925115000 | 0.322987000 |
| B | -6.048756000 | -2.516048000 | 0.653486000 |
| B | -4.732246000 | -3.572094000 | 0.151475000 |
| B | -3.400781000 | -4.539788000 | 0.060126000 |
| B | 2.269482000  | -5.299435000 | 0.289177000 |
| B | 3.728941000  | -4.606990000 | 0.343198000 |
| B | 5.200217000  | -3.973308000 | 0.672112000 |
| B | 5.853496000  | 0.956697000  | 0.148508000 |
| B | 5.994490000  | 2.635445000  | 0.662382000 |
| B | 4.713347000  | 3.597958000  | 0.335637000 |
| B | 3.457664000  | 4.614671000  | 0.284256000 |
| B | 2.127230000  | 5.530802000  | 0.346455000 |
| B | 5.635874000  | -0.674519000 | 0.049878000 |
| B | 5.461885000  | -2.310734000 | 0.151546000 |
| B | -3.754659000 | 4.587573000  | 0.154311000 |
| B | -5.476740000 | 2.281841000  | 0.324758000 |
| B | -0.713412000 | -6.500258000 | 0.684234000 |
| B | 0.760591000  | -5.875740000 | 0.349403000 |
| B | -2.097061000 | -5.543317000 | 0.162493000 |
| B | 6.519239000  | -3.192133000 | 1.081768000 |
| B | 6.850453000  | -1.662444000 | 0.916101000 |
| B | 7.051590000  | 0.000340000  | 0.911902000 |
| B | -0.493681000 | 7.234927000  | 1.097206000 |
| B | -1.984245000 | 6.756414000  | 0.932242000 |
| B | -3.526529000 | 6.101537000  | 0.921504000 |
| B | -2.188887000 | -6.913695000 | 1.097104000 |
| B | -3.524390000 | -6.097377000 | 0.930132000 |
| B | -4.868697000 | -5.097507000 | 0.917667000 |
| B | 7.091659000  | 1.565434000  | 1.073808000 |
| B | -6.030840000 | -4.046743000 | 1.072026000 |
| B | -4.903785000 | 5.354653000  | 1.076288000 |

B<sub>70</sub> Quasiplanar Structure dianion (III)

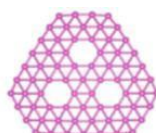

|   |              |              |              |
|---|--------------|--------------|--------------|
| B | -0.565772041 | -4.942010380 | -0.156266012 |
| B | -4.594182348 | -1.936701147 | -0.189295014 |
| B | -0.411915031 | -3.312812253 | -0.731780056 |
| B | 3.075443236  | 1.299352099  | -0.732884057 |
| B | -3.060384233 | -1.326775101 | -0.724797054 |
| B | -4.238038323 | 1.339317105  | -0.390835030 |
| B | 1.155382089  | -2.698220208 | -0.837923064 |
| B | 4.385183334  | 0.326168025  | -0.484979037 |
| B | -2.909720220 | 0.348188027  | -0.828802064 |
| B | 4.186624319  | -1.353328104 | -0.491974038 |

|   |              |              |              |
|---|--------------|--------------|--------------|
| B | 0.001522000  | -0.000582000 | -1.067556081 |
| B | -4.434647341 | -0.301363023 | -0.391652030 |
| B | -1.910610148 | -3.963449302 | -0.491264038 |
| B | 2.478566188  | -3.689267281 | -0.385201029 |
| B | 0.959159074  | -4.339004332 | -0.382449029 |
| B | 2.682528203  | -1.989119154 | -0.735688057 |
| B | 4.570173349  | 1.984334154  | -0.178413014 |
| B | -0.920806070 | 4.301684328  | -0.489149037 |
| B | -3.260344250 | -2.945272227 | -0.476015036 |
| B | 0.381541029  | 3.315352251  | -0.728846054 |
| B | -2.660463205 | 2.011301153  | -0.723307055 |
| B | 1.758990134  | 2.348167177  | -0.835190064 |
| B | 3.969197304  | -3.003836230 | -0.165687013 |
| B | 3.279753249  | 3.000014227  | -0.387417029 |
| B | -2.472803189 | 3.631379275  | -0.474823036 |
| B | 0.617408046  | 4.936267378  | -0.157627012 |
| B | -4.006399306 | 2.965703226  | -0.186210014 |
| B | 1.956447148  | 3.989582302  | -0.383010029 |
| B | -0.241333019 | -1.684582129 | -0.968037076 |
| B | 1.387219108  | -0.987693074 | -0.969879073 |
| B | 0.163033013  | 1.693008129  | -0.966331072 |
| B | -1.545931118 | -0.707464055 | -0.963438076 |
| B | -1.335229099 | 1.051773078  | -0.962665075 |
| B | 1.581164120  | 0.631372049  | -0.968263072 |
| B | 0.842322067  | 6.485442479  | 0.682433050  |
| B | -0.728678056 | 5.881325423  | 0.163209012  |
| B | -2.232284170 | 5.213322397  | 0.063212005  |
| B | -5.282955402 | 3.871735296  | 0.656871048  |
| B | -5.729515425 | 0.685644050  | 0.267752021  |
| B | -5.861101433 | -0.925115070 | 0.322987024  |
| B | -6.048756470 | -2.516048194 | 0.653486049  |
| B | -4.732246360 | -3.572094272 | 0.151475012  |
| B | -3.400781261 | -4.539788346 | 0.060126004  |
| B | 2.269482171  | -5.299435400 | 0.289177022  |
| B | 3.728941287  | -4.606990353 | 0.343198026  |
| B | 5.200217396  | -3.973308303 | 0.672112051  |
| B | 5.853496468  | 0.956697072  | 0.148508012  |
| B | 5.994490454  | 2.635445202  | 0.662382053  |
| B | 4.713347360  | 3.597958276  | 0.335637026  |
| B | 3.457664264  | 4.614671351  | 0.284256022  |
| B | 2.127230162  | 5.530802435  | 0.346455026  |
| B | 5.635874441  | -0.674519051 | 0.049878004  |
| B | 5.461885407  | -2.310734179 | 0.151546012  |
| B | -3.754659285 | 4.587573348  | 0.154311012  |
| B | -5.476740418 | 2.281841175  | 0.324758025  |
| B | -0.713412055 | -6.500258489 | 0.684234052  |
| B | 0.760591059  | -5.875740434 | 0.349403027  |
| B | -2.097061158 | -5.543317424 | 0.162493013  |

|   |              |              |             |
|---|--------------|--------------|-------------|
| B | 6.519239495  | -3.192133244 | 1.081768083 |
| B | 6.850453546  | -1.662444126 | 0.916101070 |
| B | 7.051590538  | 0.000340000  | 0.911902070 |
| B | -0.493681038 | 7.234927541  | 1.097206083 |
| B | -1.984245151 | 6.756414516  | 0.932242071 |
| B | -3.526529269 | 6.101537456  | 0.921504070 |
| B | -2.188887169 | -6.913695519 | 1.097104084 |
| B | -3.524390272 | -6.097377487 | 0.930132072 |
| B | -4.868697370 | -5.097507389 | 0.917667069 |
| B | 7.091659522  | 1.565434120  | 1.073808082 |
| B | -6.030840486 | -4.046743309 | 1.072026083 |
| B | -4.903785372 | 5.354653405  | 1.076288082 |

B<sub>70</sub> Bilayer Structure neutral (I)

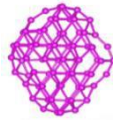

|   |              |              |              |
|---|--------------|--------------|--------------|
| B | -4.198956000 | -1.101438000 | -1.362531000 |
| B | -3.054886000 | 1.615327000  | -1.649175000 |
| B | -2.761346000 | -0.105061000 | -0.831431000 |
| B | -1.699287000 | 2.539550000  | -1.562681000 |
| B | -1.397190000 | -0.896652000 | -1.691064000 |
| B | -4.351727000 | 0.647840000  | -1.501084000 |
| B | -1.256113000 | -2.610486000 | -1.630036000 |
| B | 0.078786000  | -1.426194000 | -0.804742000 |
| B | 1.593614000  | -2.309451000 | -1.781003000 |
| B | -2.759266000 | -1.905208000 | -1.457608000 |
| B | -0.044737000 | 0.068961000  | -1.783420000 |
| B | 3.079633000  | -1.513951000 | -1.743212000 |
| B | 0.221830000  | -3.223098000 | -1.584220000 |
| B | -0.176125000 | 1.608680000  | -0.865741000 |
| B | 1.320619000  | 1.056312000  | -1.658511000 |
| B | -0.358760000 | 3.507560000  | -1.415303000 |
| B | 2.634918000  | 2.131661000  | -1.422560000 |
| B | 1.462575000  | -0.645033000 | -1.679052000 |
| B | -1.537829000 | 0.823792000  | -1.684476000 |
| B | 4.085296000  | 1.305365000  | -1.301086000 |
| B | 1.109561000  | 2.756604000  | -1.532383000 |
| B | 4.199293000  | -0.383596000 | -1.533535000 |
| B | 2.647419000  | 0.322045000  | -0.800608000 |
| B | -4.189667000 | -0.999540000 | 1.565198000  |
| B | -3.014579000 | 1.773900000  | 1.374521000  |
| B | -2.775087000 | -0.031004000 | 0.867802000  |
| B | -1.595126000 | 2.613951000  | 1.448943000  |
| B | -1.497229000 | -0.748891000 | 1.901681000  |
| B | -4.338246000 | 0.776127000  | 1.352670000  |
| B | -1.596290000 | -2.685274000 | 1.391852000  |
| B | 0.016033000  | -1.433359000 | 0.883322000  |

|   |              |              |              |
|---|--------------|--------------|--------------|
| B | 1.438260000  | -2.309231000 | 1.683593000  |
| B | -2.781017000 | -1.708876000 | 2.040063000  |
| B | -0.100209000 | 0.107172000  | 1.801150000  |
| B | 2.943504000  | -1.445020000 | 1.749604000  |
| B | -0.012650000 | -3.220977000 | 1.357115000  |
| B | -0.154180000 | 1.625973000  | 0.790396000  |
| B | 1.277309000  | 1.067184000  | 1.677021000  |
| B | -0.260430000 | 3.570956000  | 1.270182000  |
| B | 2.665690000  | 2.102049000  | 1.565228000  |
| B | 1.394335000  | -0.638459000 | 1.811538000  |
| B | -1.541332000 | 0.943872000  | 1.603980000  |
| B | 4.072020000  | 1.311042000  | 1.534875000  |
| B | 1.177205000  | 2.769542000  | 1.447125000  |
| B | 4.156095000  | -0.386160000 | 1.692796000  |
| B | 2.633272000  | 0.277911000  | 0.899573000  |
| B | 5.029536000  | 1.801437000  | 0.077666000  |
| B | -1.191995000 | -4.030193000 | 0.285837000  |
| B | -5.117339000 | -1.667053000 | 0.084212000  |
| B | -4.388186000 | 2.307446000  | 0.349414000  |
| B | 4.155265000  | -2.416015000 | -0.029499000 |
| B | 0.352403000  | -4.346482000 | -0.042062000 |
| B | 5.041598000  | -1.047095000 | 0.089010000  |
| B | -0.377515000 | 4.792100000  | -0.087388000 |
| B | -5.359557000 | 1.135647000  | -0.048697000 |
| B | 1.100460000  | 4.352907000  | -0.046732000 |
| B | 2.357319000  | 3.292858000  | -0.012575000 |
| B | 3.926999000  | 2.836600000  | -0.414163000 |
| B | -2.450098000 | -3.201657000 | -0.330687000 |
| B | -3.984232000 | -2.654409000 | -0.397571000 |
| B | -5.570244000 | -0.294118000 | -0.824286000 |
| B | -5.549118000 | -0.299772000 | 0.860949000  |
| B | 5.442335000  | 0.353928000  | -0.752435000 |
| B | 5.368630000  | 0.390817000  | 0.909306000  |
| B | 2.872920000  | -3.009614000 | 0.960045000  |
| B | 1.563813000  | -3.924471000 | 1.050097000  |
| B | 1.666216000  | -3.930884000 | -0.966961000 |
| B | 3.020914000  | -3.094682000 | -1.020017000 |
| B | -1.758975000 | 4.117404000  | -0.090099000 |
| B | -2.906155000 | 2.938884000  | -0.038132000 |

B<sub>70</sub> Bilayer Structure dianion (I)

|   |              |              |              |
|---|--------------|--------------|--------------|
| B | -4.223880000 | -1.113108000 | -1.369873000 |
| B | -3.071074000 | 1.585234000  | -1.636113000 |
| B | -2.764003000 | -0.113201000 | -0.807851000 |
| B | -1.715958000 | 2.525049000  | -1.558537000 |
| B | -1.409392000 | -0.904154000 | -1.680546000 |



|   |              |              |              |
|---|--------------|--------------|--------------|
| B | -4.370329000 | 0.622374000  | -1.499307000 |
| B | -1.257646000 | -2.621828000 | -1.577122000 |
| B | 0.069014000  | -1.417421000 | -0.792956000 |
| B | 1.615054000  | -2.309129000 | -1.760155000 |
| B | -2.776802000 | -1.901827000 | -1.457800000 |
| B | -0.054627000 | 0.063104000  | -1.771623000 |
| B | 3.086623000  | -1.444151000 | -1.721230000 |
| B | 0.235203000  | -3.214475000 | -1.544771000 |
| B | -0.185631000 | 1.613927000  | -0.885719000 |
| B | 1.328401000  | 1.047896000  | -1.648841000 |
| B | -0.363626000 | 3.485864000  | -1.463223000 |
| B | 2.638764000  | 2.148333000  | -1.423545000 |
| B | 1.458220000  | -0.645920000 | -1.689351000 |
| B | -1.548676000 | 0.814241000  | -1.705647000 |
| B | 4.083356000  | 1.325470000  | -1.317950000 |
| B | 1.112448000  | 2.742369000  | -1.595503000 |
| B | 4.241091000  | -0.321629000 | -1.639093000 |
| B | 2.653246000  | 0.284010000  | -0.800761000 |
| B | -4.175451000 | -0.999813000 | 1.567707000  |
| B | -3.027179000 | 1.780855000  | 1.362980000  |
| B | -2.764952000 | -0.030720000 | 0.879297000  |
| B | -1.595867000 | 2.625465000  | 1.386069000  |
| B | -1.498575000 | -0.715952000 | 1.990843000  |
| B | -4.347076000 | 0.772942000  | 1.363853000  |
| B | -1.621279000 | -2.707962000 | 1.298802000  |
| B | 0.017431000  | -1.431332000 | 0.894987000  |
| B | 1.446014000  | -2.296027000 | 1.679206000  |
| B | -2.756171000 | -1.698300000 | 2.062339000  |
| B | -0.102587000 | 0.113681000  | 1.804398000  |
| B | 2.955733000  | -1.432087000 | 1.804660000  |
| B | -0.021808000 | -3.225529000 | 1.342905000  |
| B | -0.156447000 | 1.635799000  | 0.767395000  |
| B | 1.281472000  | 1.072479000  | 1.642854000  |
| B | -0.252940000 | 3.587917000  | 1.230497000  |
| B | 2.664193000  | 2.106497000  | 1.572373000  |
| B | 1.401431000  | -0.631995000 | 1.800138000  |
| B | -1.545434000 | 0.965056000  | 1.588932000  |
| B | 4.073402000  | 1.315197000  | 1.543482000  |
| B | 1.184704000  | 2.787513000  | 1.413172000  |
| B | 4.159781000  | -0.368443000 | 1.723042000  |
| B | 2.635393000  | 0.275924000  | 0.887974000  |
| B | 5.074190000  | 1.791049000  | 0.078297000  |
| B | -1.190195000 | -4.070423000 | 0.165322000  |
| B | -5.110301000 | -1.670749000 | 0.095777000  |
| B | -4.414689000 | 2.315690000  | 0.432582000  |
| B | 4.199225000  | -2.450839000 | -0.033641000 |
| B | 0.384580000  | -4.368122000 | -0.059724000 |
| B | 5.028761000  | -1.055492000 | 0.149703000  |

|   |              |              |              |
|---|--------------|--------------|--------------|
| B | -0.384685000 | 4.785604000  | -0.144074000 |
| B | -5.352224000 | 1.130350000  | -0.032959000 |
| B | 1.083933000  | 4.335264000  | -0.000442000 |
| B | 2.359176000  | 3.302005000  | -0.006613000 |
| B | 3.922784000  | 2.798258000  | -0.361945000 |
| B | -2.443206000 | -3.197644000 | -0.319546000 |
| B | -4.006998000 | -2.655138000 | -0.425450000 |
| B | -5.619465000 | -0.289609000 | -0.789441000 |
| B | -5.588373000 | -0.309037000 | 0.871055000  |
| B | 5.459201000  | 0.325939000  | -0.728705000 |
| B | 5.396996000  | 0.381224000  | 0.909850000  |
| B | 2.877088000  | -2.996966000 | 0.940702000  |
| B | 1.556193000  | -3.904870000 | 1.071239000  |
| B | 1.685387000  | -3.926018000 | -0.975786000 |
| B | 3.037498000  | -3.067505000 | -0.982653000 |
| B | -1.777197000 | 4.115733000  | -0.072694000 |
| B | -2.911244000 | 2.929107000  | -0.041244000 |

B<sub>70</sub> tubular Structure neutral (II)

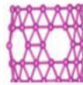

|   |              |              |              |
|---|--------------|--------------|--------------|
| B | 1.702405000  | 3.422315000  | 2.945172000  |
| B | 3.008237000  | 2.488277000  | 2.920756000  |
| B | 3.781936000  | -0.561478000 | 2.945139000  |
| B | 3.297209000  | -2.092233000 | 2.920453000  |
| B | 0.634329000  | -3.769227000 | 2.945227000  |
| B | -0.971324000 | -3.781075000 | 2.920712000  |
| B | -3.390324000 | -1.769294000 | 2.945131000  |
| B | -3.896332000 | -0.245600000 | 2.920854000  |
| B | -2.728693000 | 2.676231000  | 2.945358000  |
| B | -1.437373000 | 3.630396000  | 2.920595000  |
| B | 3.600199000  | 1.887905000  | 1.429993000  |
| B | 3.944145000  | 0.248209000  | 1.462497000  |
| B | 2.907531000  | -2.839757000 | 1.429799000  |
| B | 1.453921000  | -3.672622000 | 1.462504000  |
| B | -1.802714000 | -3.642669000 | 1.429800000  |
| B | -3.046212000 | -2.519739000 | 1.462570000  |
| B | -4.021745000 | 0.588185000  | 1.430016000  |
| B | -3.334993000 | 2.116328000  | 1.462477000  |
| B | -0.683152000 | 4.007458000  | 1.430152000  |
| B | 0.982436000  | 3.826263000  | 1.462538000  |
| B | 4.212511000  | -0.597882000 | -0.000158000 |
| B | 0.732987000  | -4.190681000 | -0.000015000 |
| B | -3.760222000 | -1.992742000 | -0.000323000 |
| B | -3.055825000 | 2.959251000  | 0.000293000  |
| B | 1.870039000  | 3.821113000  | 0.000166000  |
| B | 2.907956000  | -2.840601000 | -1.430091000 |
| B | 1.454735000  | -3.674150000 | -1.462579000 |

|   |              |              |              |
|---|--------------|--------------|--------------|
| B | -1.802490000 | -3.643116000 | -1.429974000 |
| B | -3.043005000 | -2.517058000 | -1.462438000 |
| B | -4.021289000 | 0.588597000  | -1.429944000 |
| B | -3.336554000 | 2.117733000  | -1.462466000 |
| B | -0.683223000 | 4.007373000  | -1.429844000 |
| B | 0.982522000  | 3.828265000  | -1.462523000 |
| B | 3.599525000  | 1.887876000  | -1.429924000 |
| B | 3.942365000  | 0.247889000  | -1.462544000 |
| B | 0.634751000  | -3.769998000 | -2.945407000 |
| B | -0.970780000 | -3.781677000 | -2.920632000 |
| B | -3.388703000 | -1.768077000 | -2.945391000 |
| B | -3.896278000 | -0.244737000 | -2.920922000 |
| B | -2.729562000 | 2.677345000  | -2.944986000 |
| B | -1.437453000 | 3.630313000  | -2.920463000 |
| B | 1.702056000  | 3.422704000  | -2.945008000 |
| B | 3.007905000  | 2.488657000  | -2.920675000 |
| B | 3.781393000  | -0.561629000 | -2.945197000 |
| B | 3.296785000  | -2.092479000 | -2.920654000 |
| B | -2.371889000 | -2.997578000 | -2.945256000 |
| B | -3.584218000 | 1.329998000  | -2.945318000 |
| B | 0.156805000  | 3.820123000  | -2.944917000 |
| B | 3.680572000  | 1.030758000  | -2.945237000 |
| B | 2.118608000  | -3.183203000 | -2.945277000 |
| B | -3.916847000 | -1.087729000 | -1.430283000 |
| B | -2.245576000 | 3.389201000  | -1.429922000 |
| B | 2.528389000  | 3.181733000  | -1.429696000 |
| B | 3.808631000  | -1.422121000 | -1.430114000 |
| B | -0.175382000 | -4.060854000 | -1.430095000 |
| B | 0.201819000  | 4.249747000  | 0.000317000  |
| B | 4.105047000  | 1.120998000  | -0.000149000 |
| B | 2.333932000  | -3.555960000 | 0.000103000  |
| B | -2.661176000 | -3.318932000 | -0.000351000 |
| B | -3.978739000 | 1.504704000  | 0.000082000  |
| B | 2.529248000  | 3.182395000  | 1.429972000  |
| B | -2.245226000 | 3.388786000  | 1.430120000  |
| B | -3.916534000 | -1.088119000 | 1.430027000  |
| B | -0.175779000 | -4.060789000 | 1.429990000  |
| B | 3.808518000  | -1.421803000 | 1.429996000  |
| B | 3.682016000  | 1.031005000  | 2.945098000  |
| B | 2.117946000  | -3.182000000 | 2.945306000  |
| B | -2.373253000 | -2.998761000 | 2.944964000  |
| B | -3.583576000 | 1.329109000  | 2.945260000  |
| B | 0.157032000  | 3.819128000  | 2.945334000  |

B<sub>70</sub> tubular Structure dianion (II)

|   |             |             |              |
|---|-------------|-------------|--------------|
| B | 2.486638000 | 2.862565000 | -2.973222000 |
| B | 1.143127000 | 3.727571000 | -2.932977000 |

|   |              |              |              |
|---|--------------|--------------|--------------|
| B | -2.004767000 | 3.297103000  | -2.948668000 |
| B | -3.182272000 | 2.184142000  | -2.975729000 |
| B | -3.801674000 | -0.886894000 | -2.972194000 |
| B | -3.098586000 | -2.313881000 | -2.970753000 |
| B | -0.319415000 | -3.751005000 | -2.962993000 |
| B | 1.293978000  | -3.676565000 | -2.935042000 |
| B | 3.615379000  | -1.509206000 | -2.952567000 |
| B | 3.852294000  | 0.076148000  | -2.988239000 |
| B | 0.356652000  | 3.997221000  | -1.439918000 |
| B | -1.318265000 | 3.729626000  | -1.479791000 |
| B | -3.786169000 | 1.575684000  | -1.469718000 |
| B | -4.058860000 | -0.079836000 | -1.491787000 |
| B | -2.666282000 | -3.036387000 | -1.450016000 |
| B | -1.164478000 | -3.779098000 | -1.479754000 |
| B | 2.102373000  | -3.461184000 | -1.450778000 |
| B | 3.295499000  | -2.259376000 | -1.482341000 |
| B | 3.992049000  | 0.924575000  | -1.459548000 |
| B | 3.199030000  | 2.386732000  | -1.481653000 |
| B | -2.143256000 | 3.556454000  | 0.000079000  |
| B | -3.984907000 | -0.940487000 | 0.000094000  |
| B | -0.377353000 | -4.175238000 | 0.000146000  |
| B | 3.830036000  | -1.609318000 | -0.000122000 |
| B | 2.764346000  | 3.168643000  | -0.000124000 |
| B | -3.786011000 | 1.575569000  | 1.469858000  |
| B | -4.059731000 | -0.079813000 | 1.491983000  |
| B | -2.666350000 | -3.036354000 | 1.450311000  |
| B | -1.164144000 | -3.778150000 | 1.479933000  |
| B | 2.102567000  | -3.461134000 | 1.450740000  |
| B | 3.295714000  | -2.259298000 | 1.482122000  |
| B | 3.992387000  | 0.924656000  | 1.459279000  |
| B | 3.199013000  | 2.386577000  | 1.481299000  |
| B | 0.356853000  | 3.997315000  | 1.439796000  |
| B | -1.317845000 | 3.728598000  | 1.479777000  |
| B | -3.802033000 | -0.886824000 | 2.972393000  |
| B | -3.098497000 | -2.313559000 | 2.971016000  |
| B | -0.319122000 | -3.750435000 | 2.963187000  |
| B | 1.294325000  | -3.676450000 | 2.935053000  |
| B | 3.615759000  | -1.509150000 | 2.952338000  |
| B | 3.852511000  | 0.076210000  | 2.987997000  |
| B | 2.486958000  | 2.862656000  | 2.973001000  |
| B | 1.143481000  | 3.727670000  | 2.932795000  |
| B | -2.004396000 | 3.296642000  | 2.948763000  |
| B | -3.182190000 | 2.183956000  | 2.975887000  |
| B | -1.865872000 | -3.367332000 | 2.949700000  |
| B | 2.605436000  | -2.765887000 | 2.973948000  |
| B | 3.549248000  | 1.652133000  | 2.950900000  |
| B | -0.469429000 | 3.731637000  | 2.964672000  |
| B | -3.842717000 | 0.736155000  | 2.970685000  |

|   |              |              |              |
|---|--------------|--------------|--------------|
| B | 0.519136000  | -3.976732000 | 1.439554000  |
| B | 4.029430000  | -0.766694000 | 1.460652000  |
| B | 1.957275000  | 3.540052000  | 1.448320000  |
| B | -2.788655000 | 2.931819000  | 1.452017000  |
| B | -3.720456000 | -1.725902000 | 1.469995000  |
| B | 3.763645000  | 1.763519000  | -0.000153000 |
| B | -0.544758000 | 4.160257000  | 0.000057000  |
| B | -4.014033000 | 0.777715000  | 0.000077000  |
| B | -1.999114000 | -3.643088000 | 0.000156000  |
| B | 2.884661000  | -3.052683000 | -0.000060000 |
| B | 1.957048000  | 3.539932000  | -1.448536000 |
| B | 4.029186000  | -0.766714000 | -1.460900000 |
| B | 0.518938000  | -3.976826000 | -1.439484000 |
| B | -3.720629000 | -1.726091000 | -1.469779000 |
| B | -2.788519000 | 2.931702000  | -1.451836000 |
| B | -0.469757000 | 3.732026000  | -2.964666000 |
| B | -3.842312000 | 0.736093000  | -2.970542000 |
| B | -1.866185000 | -3.367868000 | -2.949450000 |
| B | 2.605100000  | -2.765977000 | -2.974037000 |
| B | 3.548967000  | 1.652082000  | -2.951200000 |
